# Supplementary material for: NeoFuse: predicting fusion neoantigens from RNA sequencing data
Source: PubMed Central journal article supplement (PMC7141848; doi:10.1093/bioinformatics/btz879), 2019-11-22
Supplement: btz879_supplementary_data.pdf [file btz879_supplementary_data.pdf]

**Supplementary Figure 1** | Performance of computational methods for gene fusion prediction tested on two paired-end RNA-seq datasets (Edgren et al. 2011; Berger et al. 2010) for which a list of PCR-validated fusions was available. Performance was assessed in terms of total gene fusions called ('Tot fusions') and number of validated fusions identified ('True positives'). The tested methods were: STAR-Fusion (Haas et al. 2017), FusionCatcher (Nicorici et al. 2014), EricScript (Benelli et al. 2012), and Arriba (<https://github.com/suhrig/arriba>). Arriba was run with the '-c L', '-c M', or '-c H' option to select fusions based on their confidence score as explained in the main text.

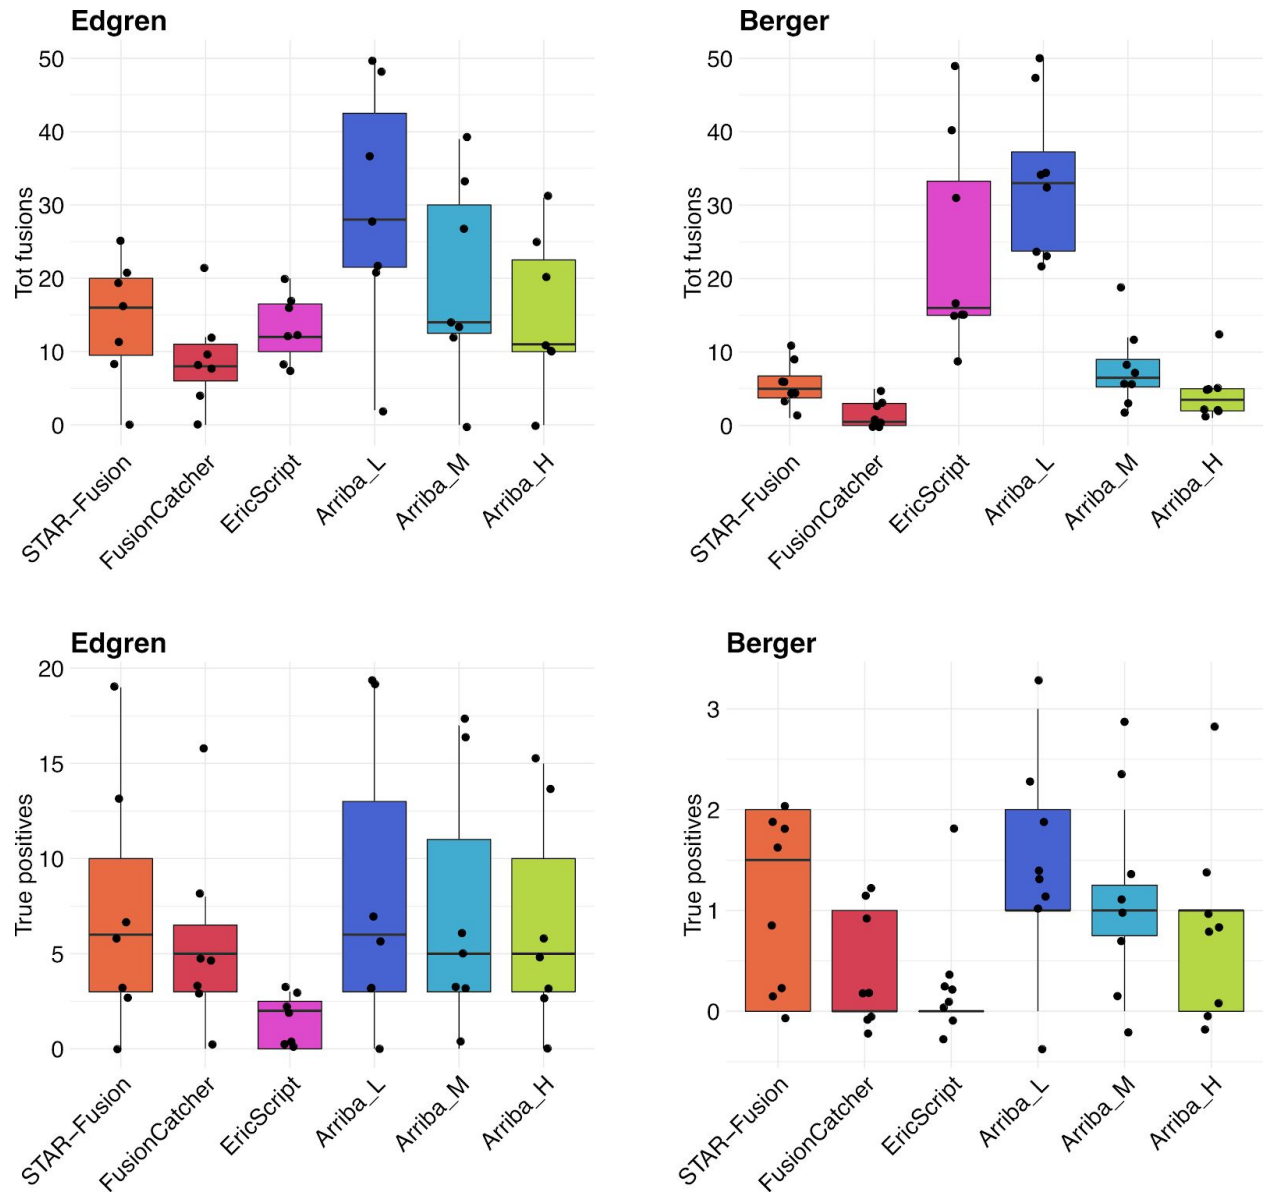

**Supplementary Figure 2 |** HLA coverage plots generated by OptiType for the SRR1035698 (a) and SRR1107834 (b) datasets, showing the low HLA-B gene read coverage of the latter.

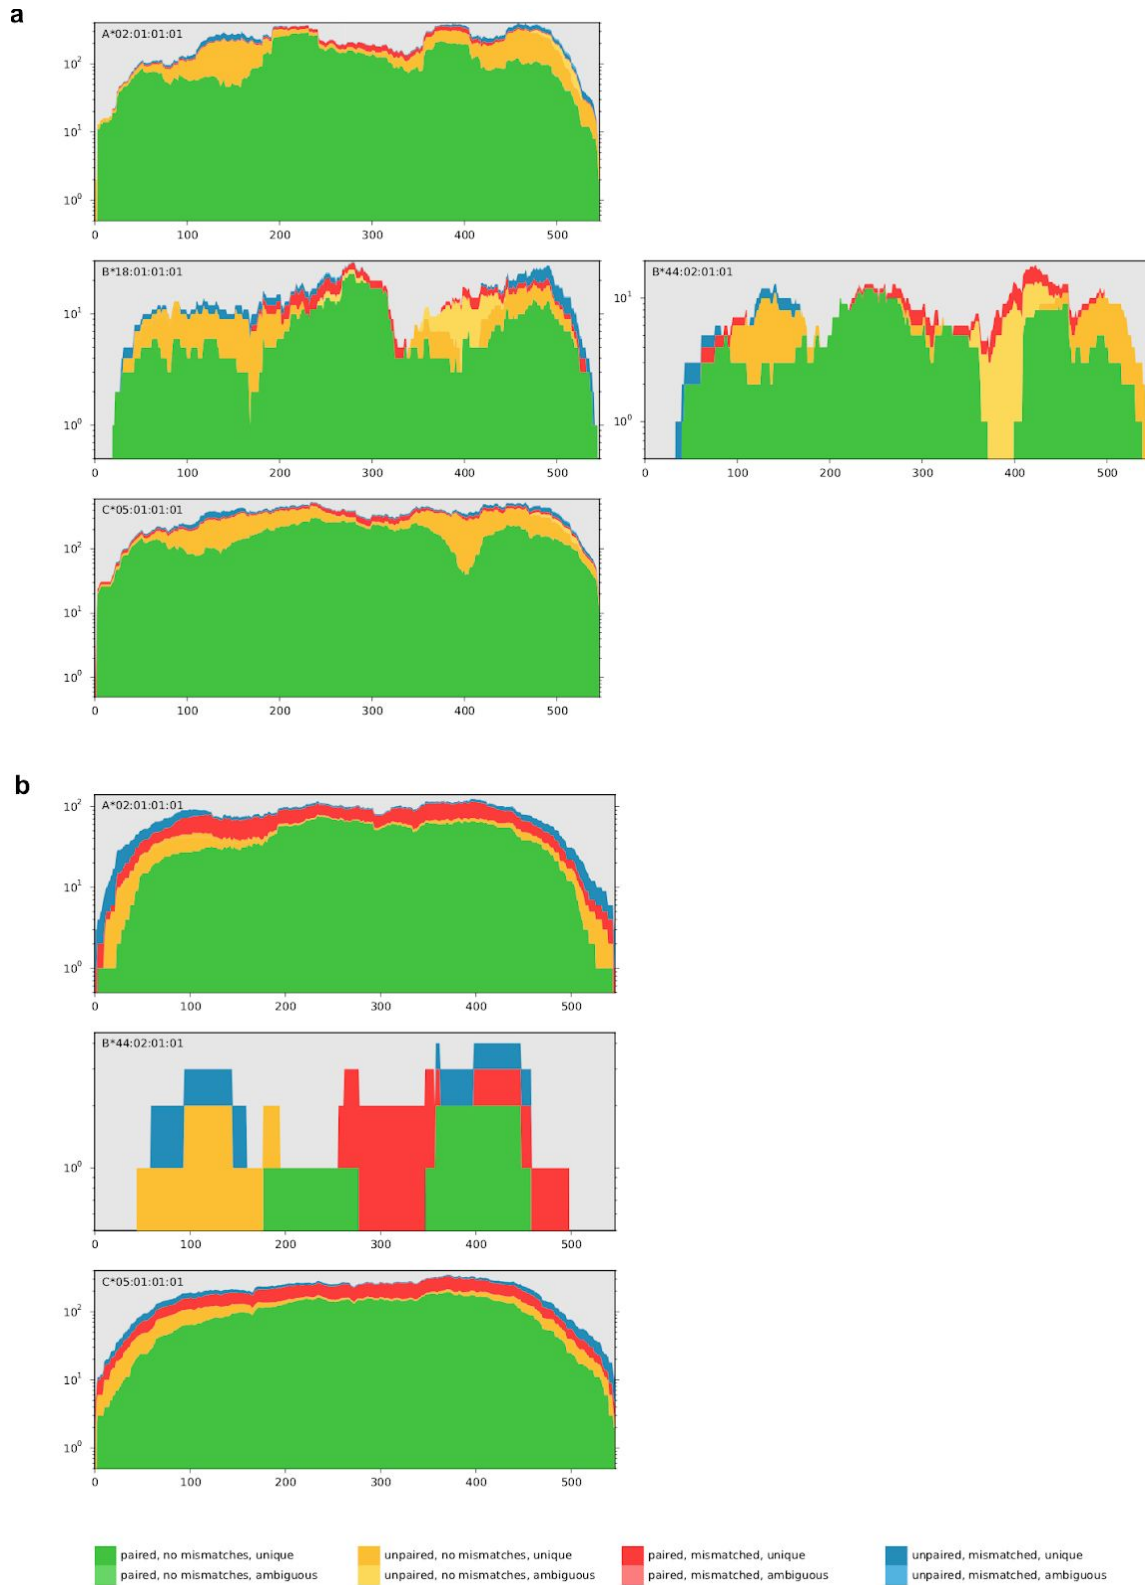

**Supplementary Table 1** | Results of NeoFuse analysis of paired-end RNA-seq datasets from the MCF7 breast cancer cell line in terms of: number of fusion neoantigens identified (unique peptides), number of unique neoantigen-generating gene fusions, percentage of out-of-frame gene fusions, and percentage of fusions with premature stop codons. The first column reports the identifiers for data retrieval from the European Genome-phenome Archive (EGA, <https://www.ebi.ac.uk/ega/home>) or from the Sequence Read Archive (SRA, <https://www.ncbi.nlm.nih.gov/sra>).

| <b>Dataset identifier</b> | <b>Fusion neoantigens</b> | <b>Gene fusions</b> | <b>Out-of-frame fusions [%]</b> | <b>Premature stop codons [%]</b> |
|---------------------------|---------------------------|---------------------|---------------------------------|----------------------------------|
| EGAR00001163650           | 200                       | 58                  | 91.38                           | 65.52                            |
| SRR1035698                | 108                       | 31                  | 83.87                           | 61.29                            |
| SRR1107833                | 155                       | 41                  | 78.05                           | 58.54                            |
| SRR1107834                | 185                       | 40                  | 80.00                           | 55.00                            |
| SRR1107835                | 150                       | 37                  | 81.08                           | 48.65                            |
| SRR1313067                | 97                        | 29                  | 82.76                           | 58.62                            |
| SRR2532362                | 139                       | 45                  | 88.89                           | 57.78                            |
| SRR925723                 | 118                       | 35                  | 85.71                           | 62.86                            |

**Supplementary Table 2** | Class-I HLA genes results obtained with NeoFuse on paired-end RNA-seq datasets from the MCF7 breast cancer cell line: genotypes and expression levels in transcripts per million (TPM, in brackets). In bold, the MCF7 genotype in agreement with the gold standard defined in (Adams et al. 2005) using high-resolution sequence-based typing.

| Dataset identifier | HLA-A                      | HLA-B                             | HLA-C                      |
|--------------------|----------------------------|-----------------------------------|----------------------------|
| EGAR00001163650    | A*02:01<br>(100.92)        | B*18:01<br>(18.62)                | C*05:01<br>(104.71)        |
| SRR1035698         | <b>A*02:01</b><br>(126.09) | <b>B*18:01-B*44:02</b><br>(75.82) | <b>C*05:01</b><br>(176.91) |
| SRR1107833         | A*02:01<br>(24.55)         | B*44:02<br>(15.83)                | C*05:01<br>(71.05)         |
| SRR1107834         | A*02:01<br>(24.62)         | B*44:02<br>(14.16)                | C*05:01<br>(72.54)         |
| SRR1107835         | A*02:01<br>(23.97)         | B*44:02<br>(17.70)                | C*05:01<br>(71.59)         |
| SRR1313067         | A*02:01<br>(124.04)        | B*18:01<br>(22.84)                | C*05:01<br>(100.91)        |
| SRR2532362         | A*02:01<br>(149.82)        | B*18:01<br>(52.16)                | C*05:01<br>(185.05)        |
| SRR925723          | A*02:01<br>(76.58)         | B*44:02<br>(20.91)                | C*05:01<br>(81.89)         |

## Supplementary References

- Adams, Sharon, Fu-Meei Robbins, Deborah Chen, Devika Wagage, Susan L. Holbeck, Herbert C. Morse 3rd, David Stroncek, and Francesco M. Marincola. 2005. "HLA Class I and II Genotype of the NCI-60 Cell Lines." *Journal of Translational Medicine* 3 (1): 11.
- Benelli, Matteo, Chiara Pescucci, Giuseppina Marseglia, Marco Severgnini, Francesca Torricelli, and Alberto Magi. 2012. "Discovering Chimeric Transcripts in Paired-End RNA-Seq Data by Using EricScript." *Bioinformatics* 28 (24): 3232–39.
- Berger, Michael F., Joshua Z. Levin, Krishna Vijayendran, Andrey Sivachenko, Xian Adiconis, Jared Maguire, Laura A. Johnson, et al. 2010. "Integrative Analysis of the Melanoma Transcriptome." *Genome Research* 20 (4): 413–27.
- Edgren, Henrik, Astrid Murumagi, Sara Kangaspeska, Daniel Nicorici, Vesa Hongisto, Kristine Kleivi, Inga H. Rye, et al. 2011. "Identification of Fusion Genes in Breast Cancer by Paired-End RNA-Sequencing." *Genome Biology* 12 (1): R6.
- Haas, Brian J., Alex Dobin, Nicolas Stransky, Bo Li, Xiao Yang, Timothy Tickle, Asma Bankapur, et al. 2017. "STAR-Fusion: Fast and Accurate Fusion Transcript Detection from RNA-Seq." *bioRxiv*. <https://doi.org/10.1101/120295>.
- Nicorici, Daniel, Mihaela Şatalan, Henrik Edgren, Sara Kangaspeska, Astrid Murumägi, Olli Kallioniemi, Sami Virtanen, and Olavi Kilkkü. 2014. "FusionCatcher – a Tool for Finding Somatic Fusion Genes in Paired-End RNA-Sequencing Data." *bioRxiv*. <https://doi.org/10.1101/011650>.
